# Supplementary material for: Biodegradable Polymeric Nano formulation of Acyclovir and Acyclovir prodrug for Enhanced Therapeutic Efficacy Against Herpes Simplex Virus Infections
Source: Research Square preprint supplement (doi:10.21203/rs.3.rs-7427697/v1), 2025-09-17
Supplement: Supplementary file 1 [file 54d35b42ad466ef5f37ad3c8.pdf]

**Biodegradable Polymeric Nano formulation of Acyclovir and Acyclovir prodrug for  
Enhanced Therapeutic Efficacy Against Herpes Simplex Virus Infections**

**Sushruta S Hakkimane<sup>1#</sup>, Divakarareddy Vemanna Paladugulu<sup>2#</sup>, Santosh L Gaonkar<sup>3</sup>,  
Kavitha Karunakaran<sup>4</sup>, Piya Paul Mudgal<sup>4</sup>, Yogeesh N Nayak<sup>3</sup>, Bharath Raja Guru<sup>2\*</sup>**

Department of Biotechnology, Manipal Institute of Technology Bengaluru, Manipal Academy  
of Higher Education Manipal, India

Department of Biotechnology, Manipal Institute of Technology, Manipal Academy of Higher  
Education Manipal, India

Department of Chemistry, Manipal Institute of Technology, Manipal Academy of Higher  
Education Manipal, India

Manipal Institute of Virology, Manipal Academy of Higher Education Manipal, India

# Authors contributed equally

\*Corresponding author

Bharath Raja Guru

Bharath.guru@manipal.edu

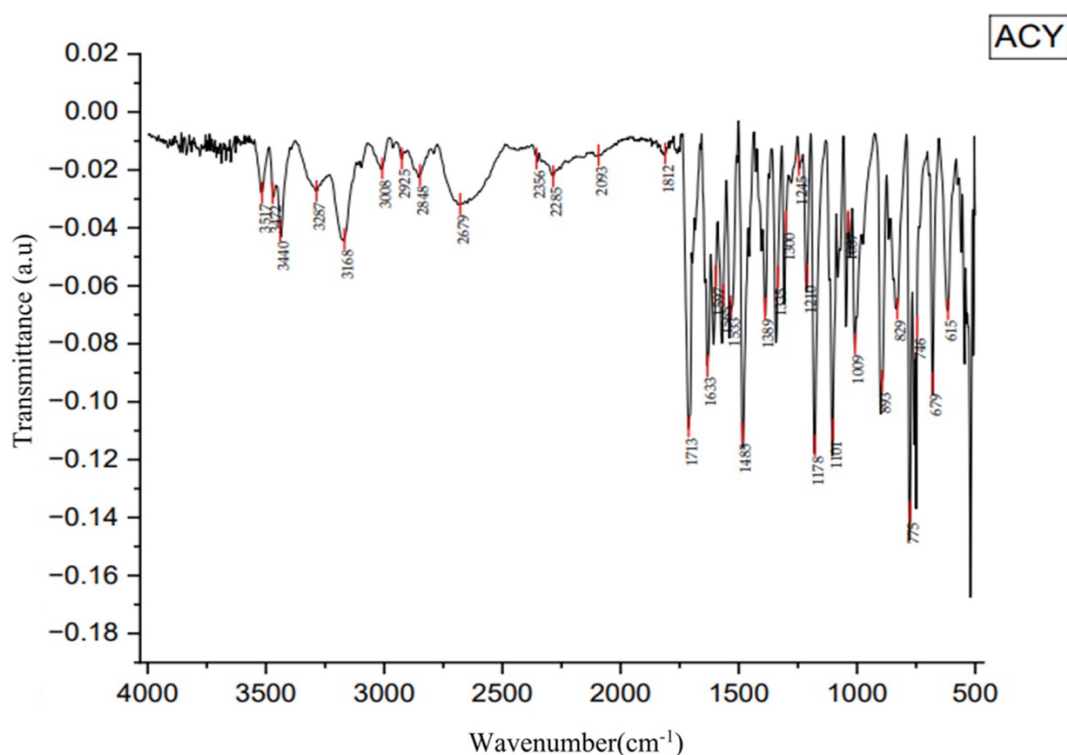

**Supplementary Fig. S1: FTIR Spectra of ACY**

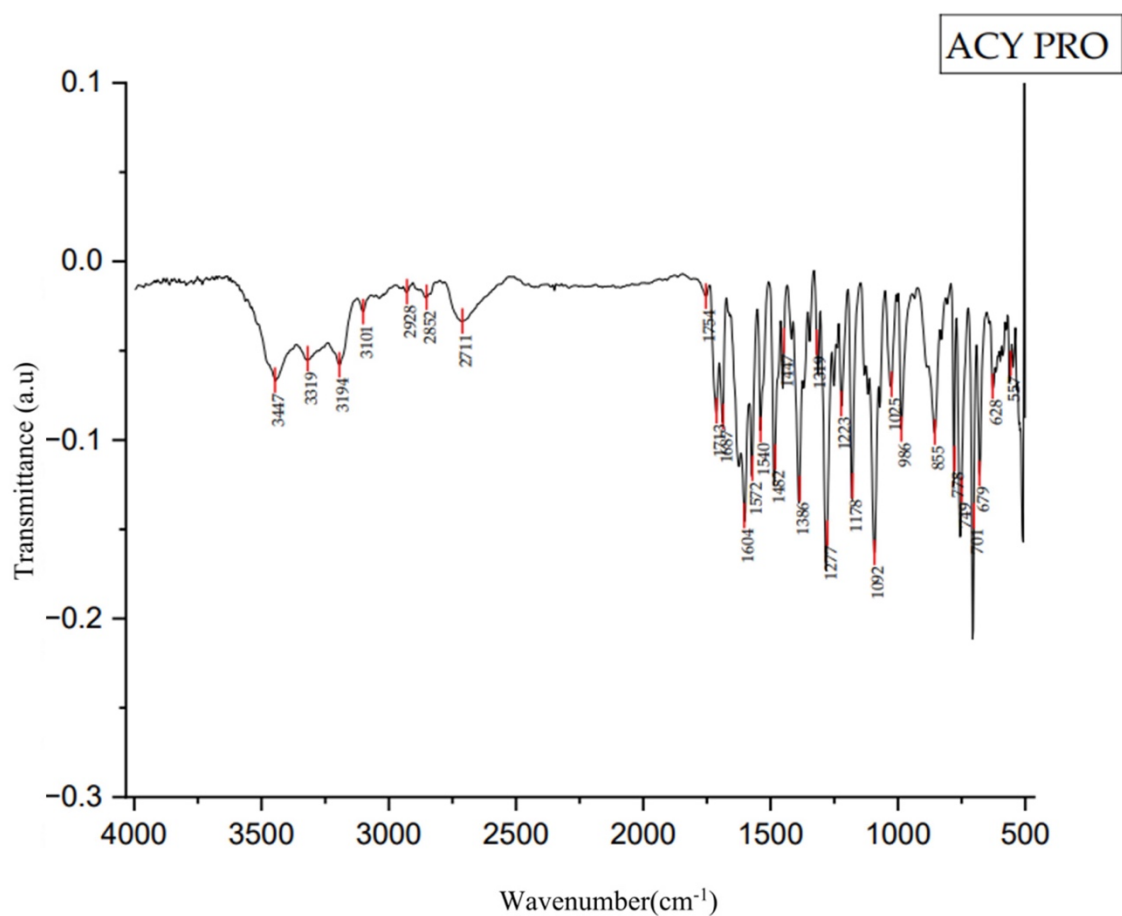

**Supplementary Fig. S2: FTIR Spectra of ACPD**

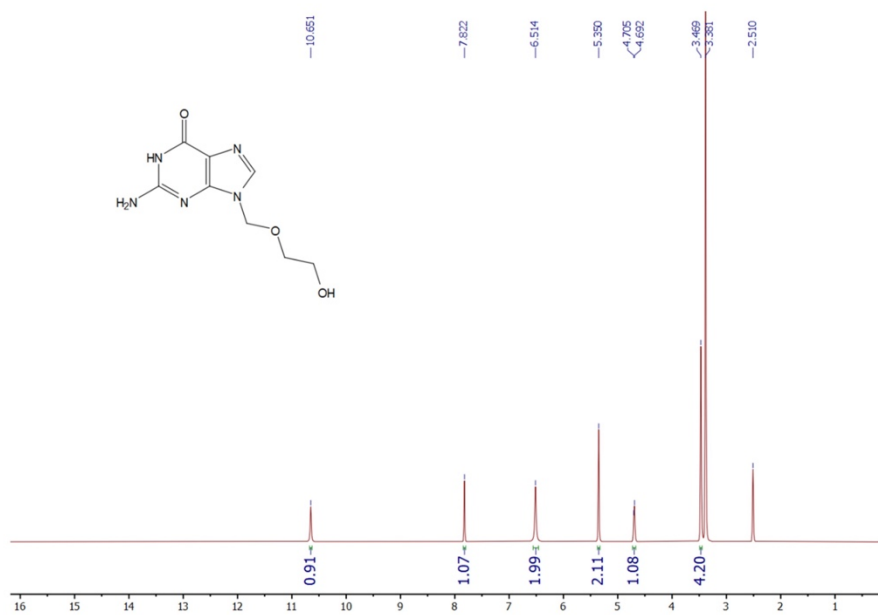

**Supplementary Fig. S3:** <sup>1</sup>H-NMR spectra of ACY

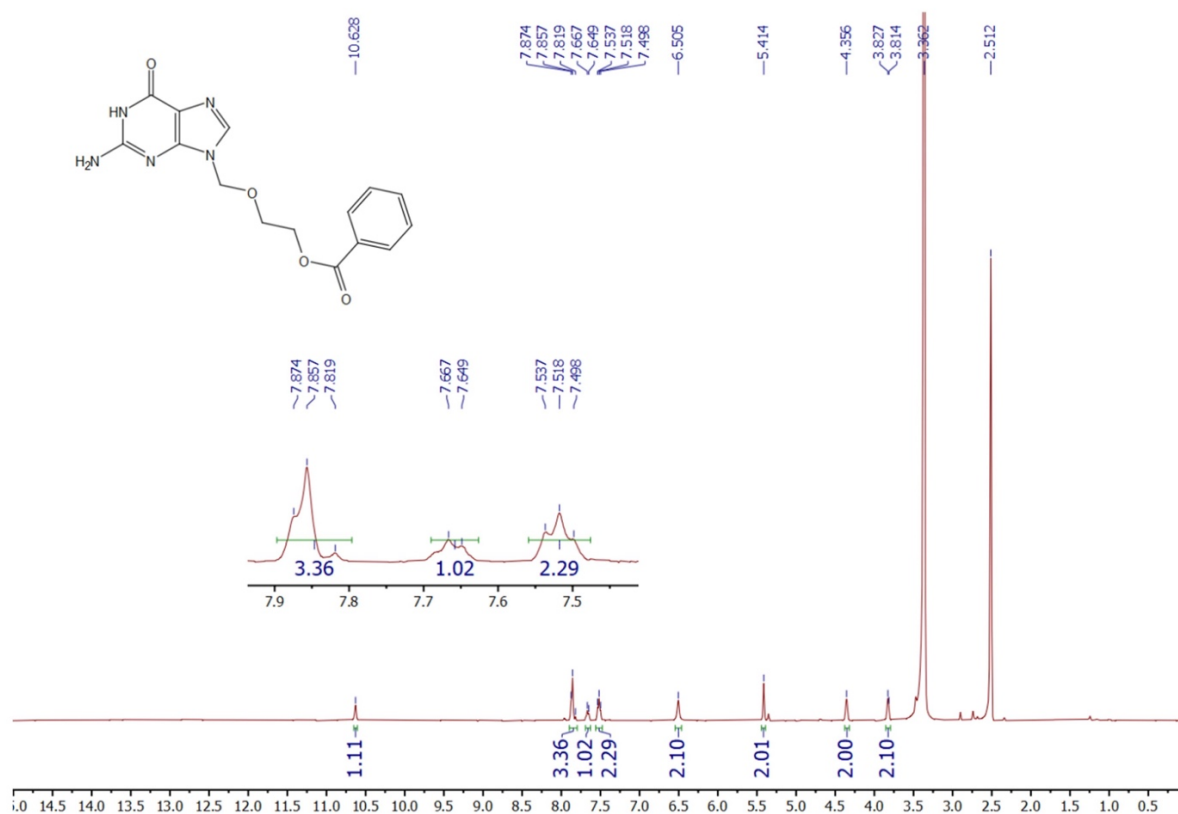

**Supplementary Fig. S4:**  $^1\text{H}$ -NMR spectra of ACPD

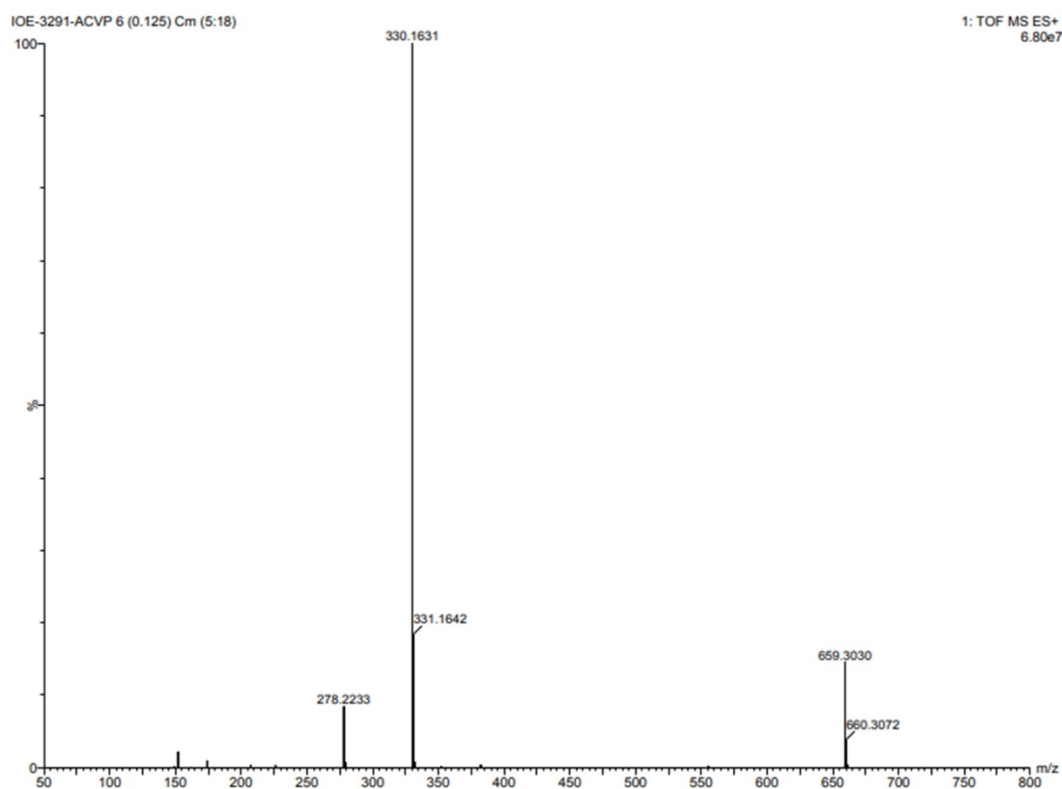

**Supplementary Fig. S5:** Mass spectra of ACPD

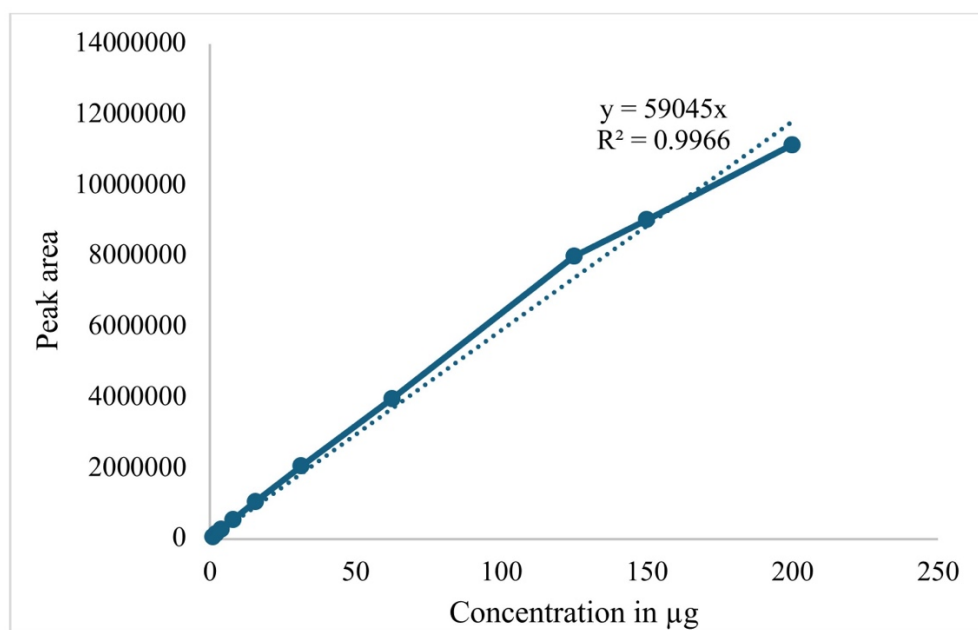

**Supplementary Fig. S6:** Calibration plot of ACY (0.976-200 $\mu\text{g}$ )

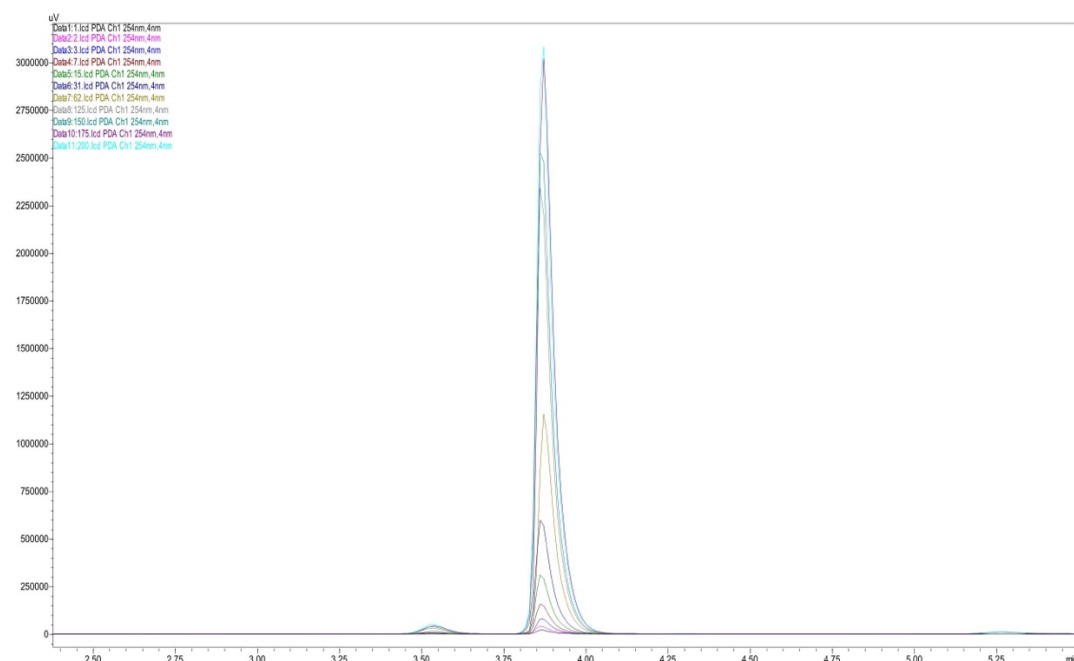

**Supplementary Fig. S7:** Graph of ACY (chromatogram stacked)

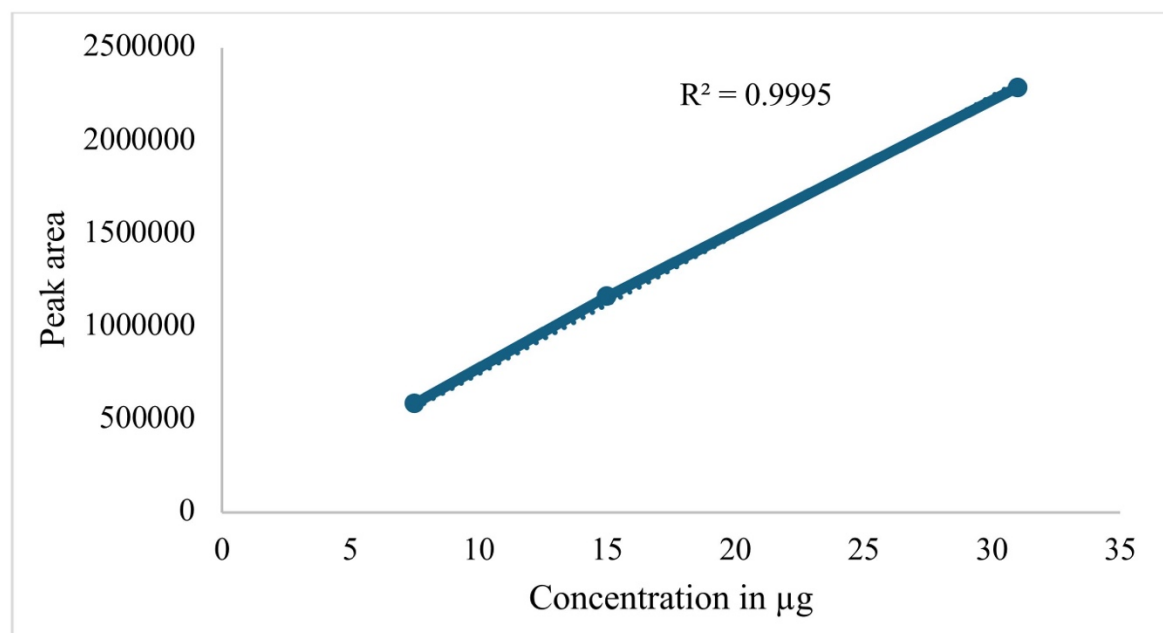

**Supplementary Fig. S8:** Precision plot Day 1

**Supplementary Table S1:** Precision Readings of 3 different concentrations Day 1

| Analyte Level<br>Concentration (ug/ml) | Trial 1 | Mean    | RSD     | % RSD |
|----------------------------------------|---------|---------|---------|-------|
| 7.81                                   | 585061  | 584366  | 1398.63 | 0.239 |
| 7.81                                   | 585281  |         |         |       |
| 7.81                                   | 582756  |         |         |       |
| 15.62                                  | 1163618 | 1163262 | 885.41  | 0.076 |
| 15.62                                  | 1162254 |         |         |       |
| 15.62                                  | 1163914 |         |         |       |
| 31.25                                  | 2287032 | 2287239 | 2039.91 | 0.089 |
| 31.25                                  | 2285311 |         |         |       |
| 31.25                                  | 2289375 |         |         |       |

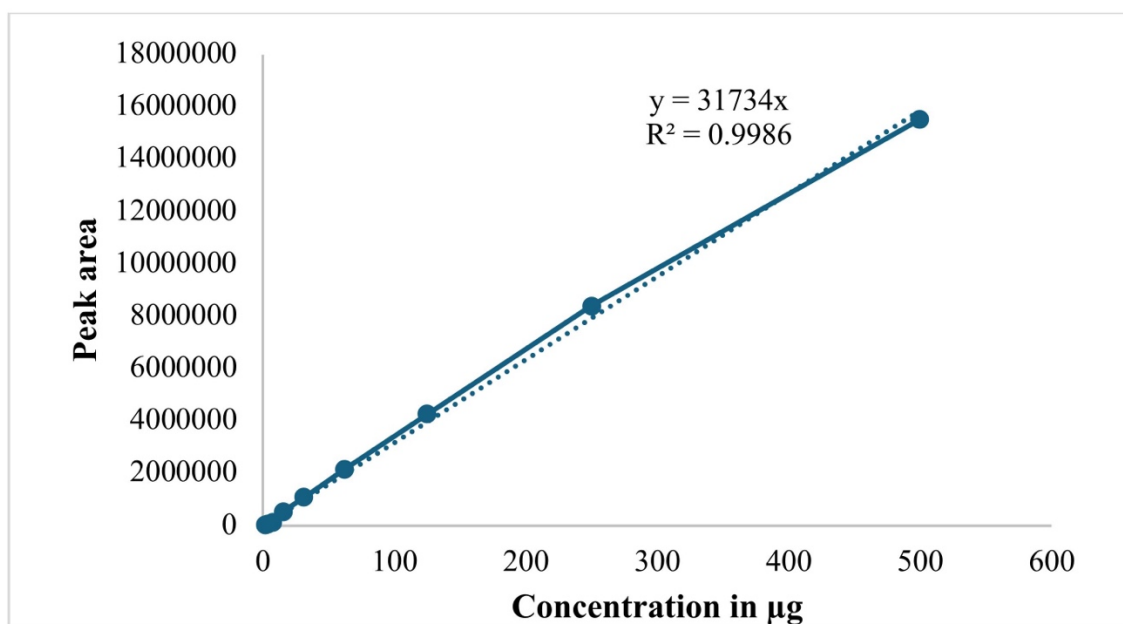**Supplementary Fig. S9:** Calibration plot of ACPD (0.976-500µg)

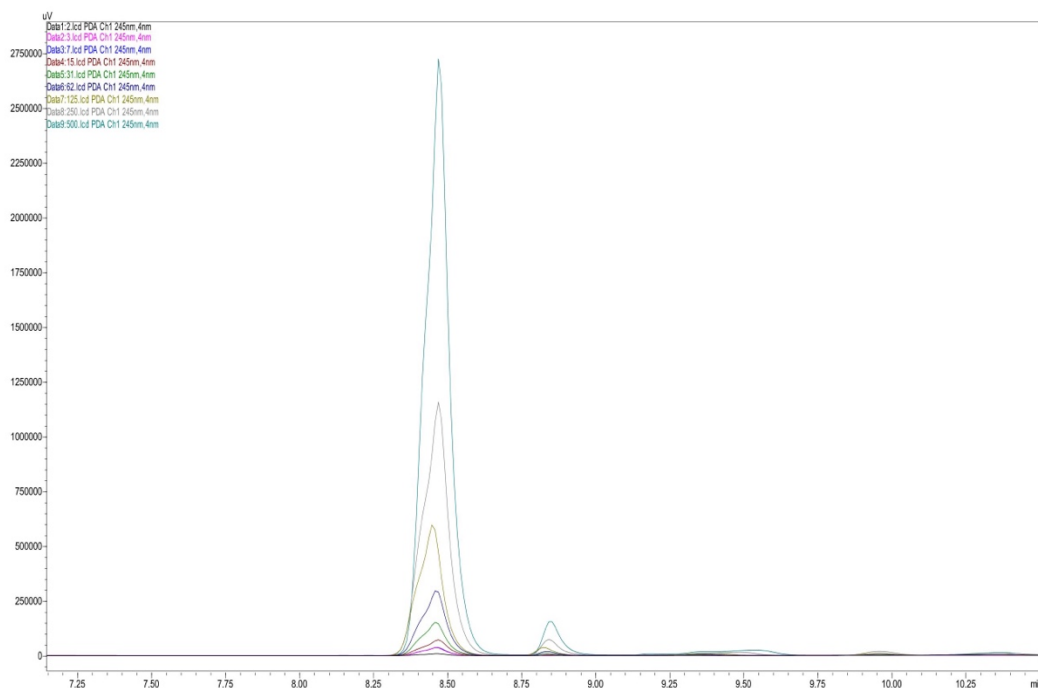

**Supplementary Fig. S10:** Stacked chromatogram of ACPD

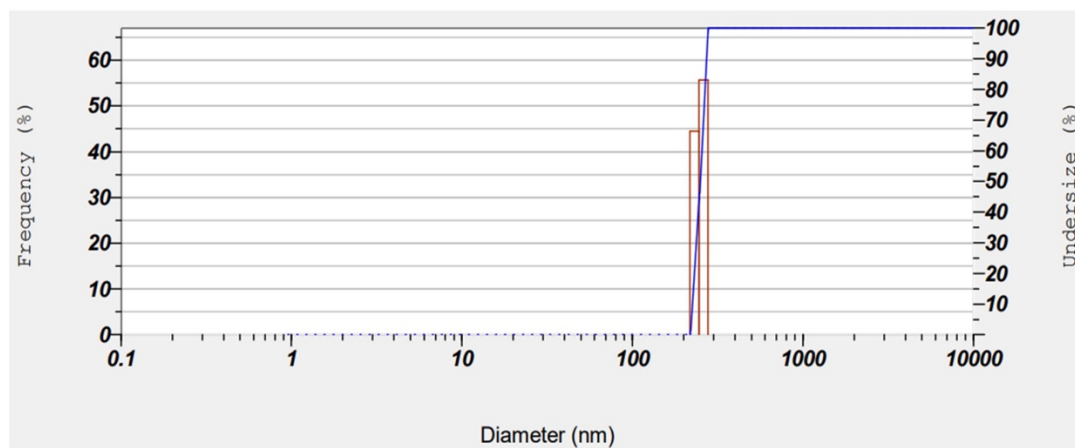

**Supplementary Fig. S11:** Particle size distribution graph of prepared plain PLGA nanoformulation



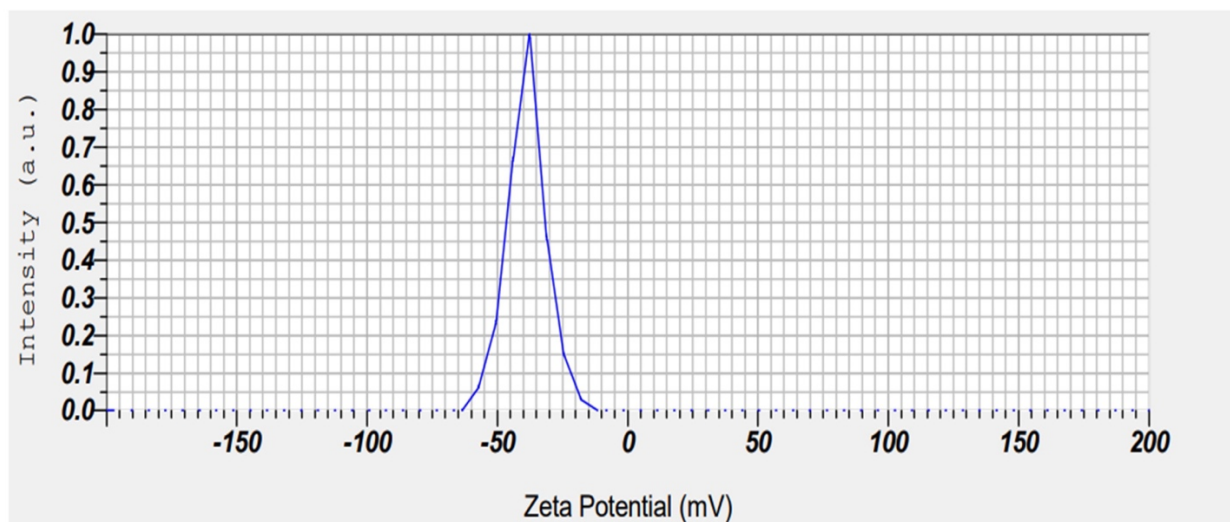

**Supplementary Fig. S12:** Zeta graph of prepared plain PLGA nanoformulation showing negative surface charge

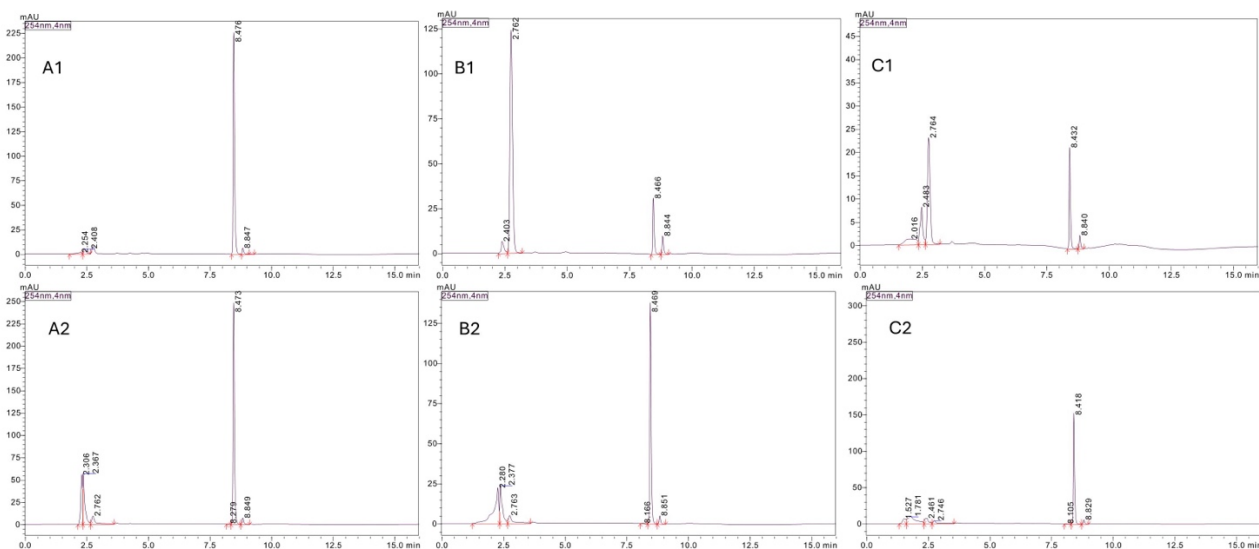

**Supplementary Fig. S13:** RP-HPLC chromatograms show converted ACY (RT 2.7 min) from ACPD NPs in *in vitro* release studies: A1) 2 hours at pH 4.5, A2) 2 hours at pH 7.4, B1) Day 14 at pH 4.5, B2) Day 14 at pH 7.4, C1) Day 28 at pH 4.5, and C2) Day 28 at pH 7.4

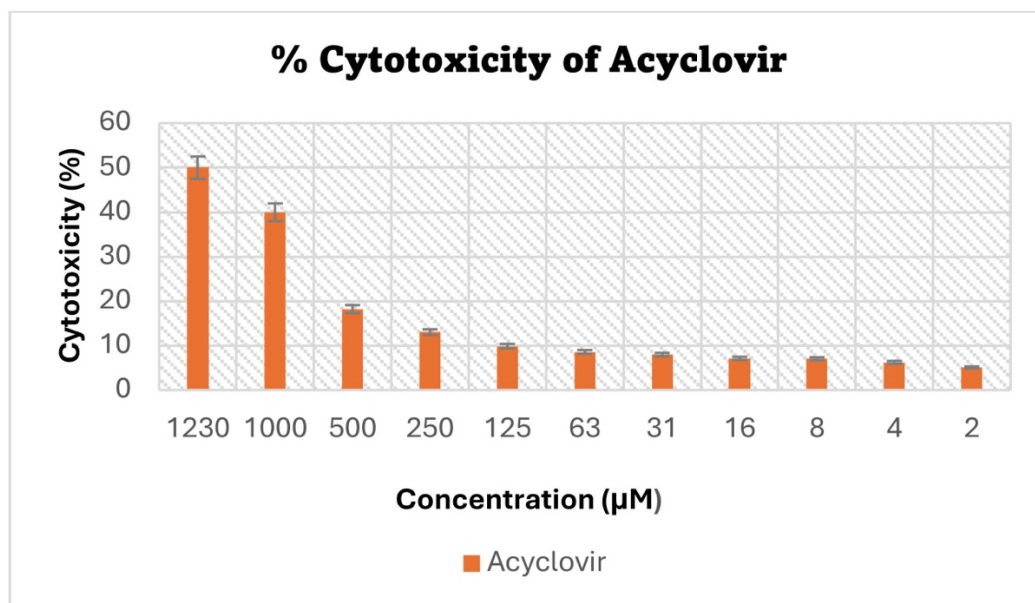

**Supplementary Fig. S14:** Graph showing cytotoxicity of Acyclovir at different concentrations

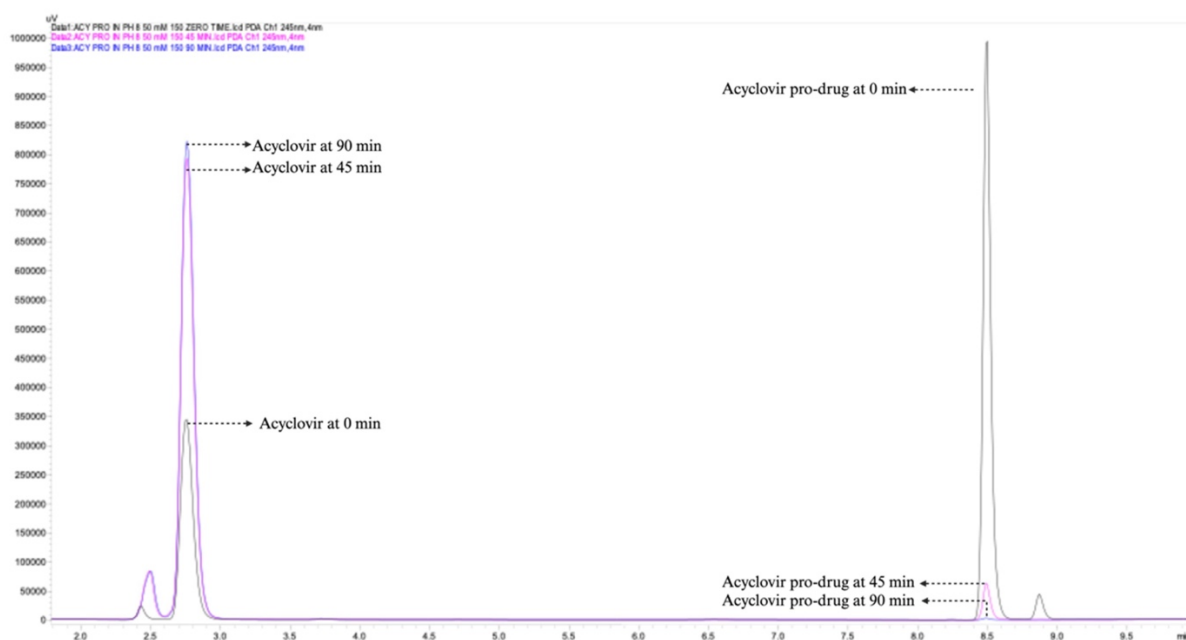

**Supplementary Fig. S15:** Chromatogram showing breakdown of ACPD to ACY
